1 **Assessment of binocular fixational eye movements including**  
2 **cyclotorsion with split-field binocular scanning laser**  
3 **ophthalmoscopy**

4 Julia Hofmann<sup>1,2#</sup>, Lennart Domdei<sup>1#</sup>, Stephanie Jainta<sup>3</sup>, Wolf Harmening<sup>1\*</sup>

5 <sup>1</sup>Rheinische Friedrich-Wilhelms-Universität Bonn, University Eye Hospital, Bonn, Germany

6 <sup>2</sup>Fraunhofer Institute for Optronics, Systems Technologies and Image Exploitations IOSB,  
7 Karlsruhe, Germany

8 <sup>3</sup>SRH University of Applied Sciences in North Rhine-Westphalia, Hamm, Germany

9 # equal first authors

10 \*corresponding author: [wolf.harmening@ukbonn.de](mailto:wolf.harmening@ukbonn.de), [ao.ukbonn.de](mailto:ao.ukbonn.de)

11 JH: [julia.hofmann@iosb.fraunhofer.de](mailto:julia.hofmann@iosb.fraunhofer.de)

12 LD: [lennart.domdei@gmail.com](mailto:lennart.domdei@gmail.com)

13 SJ: [Stephanie.Jainta@srh.de](mailto:Stephanie.Jainta@srh.de)

14

15 **Abstract**

16 Fixational eye movements are a hallmark of human gaze behavior, yet little is known  
17 about how they interact between fellow eyes. Here, we designed, built and validated  
18 a split-field binocular scanning laser ophthalmoscope (bSLO) to record high-  
19 resolution eye motion traces from both eyes of six observers during fixation at  
20 different binocular vergence conditions. In addition to microsaccades and drift,  
21 torsional eye motion could be extracted, with a spatial measurement error of less  
22 than 1 arcmin. Microsaccades were strongly coupled between fellow eyes under all  
23 conditions. No monocular microsaccade occurred and no significant delay between  
24 microsaccade onsets across fellow eyes could be detected. Cyclotorsion was also  
25 firmly coupled between both eyes, occurring typically in conjugacy, with gradual  
26 changes during drift and abrupt changes during saccades.

27

Binocular FEM with bsLO

28 **Keywords**

29 Retinal imaging; Scanning laser ophthalmoscopy; Image registration; Binocular vision; Gaze  
30 behavior; Cyclotorsion

31

32 Commercial relationships disclosure:

33 **J Hofmann**, None; **L Domdei**, None; **S Jainta**, None; **W Harmening**, None.

## Binocular FEM with bSLO

### 34 Introduction

35           Seeing with two eyes, i.e. binocularity, is central to human visual processing. For  
36 instance, ocular controls of the retinal image forming process, like pupil constriction and  
37 accommodation, are highly coupled between the two eyes ([Flitcroft, Judge & Morley, 1992](#)),  
38 and ocular motor commands issued to control gaze of one eye are tightly coupled to those  
39 of the fellow eye ([Tweed, 1997](#); [Murray, Gupta, Dulaney, Garg, Shaikh & Ghasia, 2022](#)), for  
40 example during tracking of a moving object. Less is known whether this tight coupling  
41 extends to the phases of stable fixation, where fixational eye movements (FEM)  
42 predominate ([Krauskopf, Cornsweet & Riggs, 1960](#); [Otero-Millan, Macknik & Martinez-  
43 Conde, 2014](#); [Simon, Schulz, Rassow & Haase, 1984](#)). For example, [Krauskopf, Cornsweet,  
44 and Riggs \(1960\)](#) emphasized that microsaccades occur synchronously in both eyes  
45 ([Krauskopf, Cornsweet & Riggs, 1960](#)), but this early finding is still discussed controversially  
46 ([Møller, Laursen, Tygesen & Sjølie, 2002](#); [Engbert & Kliegl, 2003](#); [Zhou & King, 1998](#)).  
47 Binocular eye movements in general cannot be reduced to the yoking of the eyes during  
48 saccades: vergence eye movements occur as horizontal, vertical or cyclovergence. All three  
49 movements show substantial differences in their contributions to fusion (i.e the perception  
50 of a single image; [Leigh & Zee, 2006](#); [Schor & Ciuffreda, 1983](#); [Steinman, Steinman, & Garzia,  
51 2000](#)): while horizontal vergence, for example, reacts to – on large scale and fine-tuned –  
52 horizontal disparity of the object that needs to be foveated, vertical vergence reacts to  
53 vertical misalignments of the whole image of one eye relative to the other eye. Vertical eye  
54 movements are supposed to be inherently conjugate in that vertical premotor neurons  
55 simultaneously drive both eyes ([McCrea, Strassman & Highstein, 1987](#)). Torsional eye  
56 movements (cyclovergence) are also small in overall variability (about  $0.10^\circ$ ), and are thus  
57 tightly controlled ([Van Rijn, van der Steen & Collewyn, 1994](#)). According to [van Rijn et al.  
58 \(1992\)](#) cyclovergence is a truly binocular process and, unlike cyclovergence, requires  
59 correspondence of the images presented to the two eyes. Finally, tremor represents a small  
60 periodic eye movement ([Martinez-Conde et al., 2004](#); [Rolf, 2009](#)), but whether tremor is a  
61 binocularly coordinated eye movement is still discussed ([Riggs & Ratliff, 1951](#); [Spausch et  
62 al., 1999](#)). Very few data exist showing all binocular eye movements – systematically –  
63 during FEM.

## Binocular FEM with bSLO

64 FEM are very small in amplitude, typically just a few minutes of arc of visual angle,  
65 and are thus not trivial to observe and to measure accurately (Rucci & Victor, 2015;  
66 Rolfs, 2009). To study FEM, both spatial and temporal resolution of the measurement  
67 technique needs to be high (Poletti & Rucci, 2015; Otero-Millan, Macknik, Langston &  
68 Martinez-Conde, 2013; Chung, Kumar, Li & Levi, 2015). Such techniques include invasive  
69 means by attaching mirrors or coils directly to the moving eyeball (Barlow, 1952), or non-  
70 invasive means such as pupil and Purkinje image video-tracking (Poletti & Rucci, 2015;  
71 Martinez-Conde, Otero-Millan & Macnik, 2013), and retinal tracking by scanning laser  
72 ophthalmoscopy (SLO) (Stevenson, Roorda & Kumar, 2010; Sheehy, Yang, Arathorn,  
73 Tiruveedhula, Boer & Roorda, 2012). Owing to the obvious disadvantages of invasive  
74 measurement techniques, the highest spatial precision is currently achieved by SLO (Sheehy,  
75 Yang, Arathorn, Tiruveedhula, Boer & Roorda, 2012). If combined with potent image  
76 registration tools and micro-stimulation tools, SLO-based retinal tracking can serve as a  
77 highly sensitive gaze tracker with minimal spatial distortions artifacts (Bowers, Boehm &  
78 Roorda, 2019), allowing also to directly observe the retinal location of fixation of a visual  
79 target (Stevenson, Roorda & Kumar, 2010; Vogel, Arathorn, Roorda & Parker, 2006).

80 In this work, we describe an improved binocular scanning laser ophthalmoscope with  
81 which fixational eye motion can be studied during binocular vision with relative ease. We  
82 measured binocular fixational eye movements in six healthy participants. Next to high-  
83 resolution measurements of binocular gaze behavior, our analysis also allowed to extract  
84 cyclotorsion, the rotation of the eyeballs around the visual axes, with high spatial resolution.

## 85 Methods

### 86 *Binocular scanning laser ophthalmoscope, bSLO*

87 A binocular scanning laser ophthalmoscope (bSLO) was developed, similar to an  
88 earlier design described by Stevenson, Sheehy and Roorda (2016), with additional functional  
89 improvements (see **Fig. 1**). Pertinent details are described here. A mirror-based ( $f = 300$   
90 mm) SLO with confocal detection scheme was designed in optical simulation software  
91 (Zemax Optics Studio, Zemax Germany GmbH, Munich, Germany), and optimized to allow  
92 diffraction limited lateral resolution across a  $3 \times 3$  deg field of view in each eye (see spot  
93 diagrams in **Fig. 1D**). Beam folding of the afocal, 4-f telescopic front-end followed  
94 orthogonal folding rules as laid out in Gomez-Vieyra et al. (2009) to minimize system

## Binocular FEM with bSLO

95 astigmatism. Light source was the fiber-coupled output of a superluminescent light emitting  
96 diode with 795 nm center wavelength (~15 nm FWHM) (SLD-CS-381-HP3-SM-795-I,  
97 Superlum, Cork, Ireland). After launching a 3.6 mm-diameter collimated beam in the  
98 reflection portion of the a 50:50 beam splitter into the bSLO front-end, galvanometric (30 Hz  
99 sawtooth) and resonant (~16 kHz sinusoidal) scanning, positioned in conjugate pupil planes,  
100 produced a raster field size of 3 x 6 (vertical x horizontal) degrees of visual angle. A knife-  
101 edge mirror (Thorlabs MRAK25-P01), placed in a retinal plane, split the rectangular raster  
102 into two square, 3 x 3-degree half-fields, which were optically relayed separately into both  
103 eyes via a lens-based Badal optometer (Range of correctible ocular defocus: +2 to -7D). The  
104 last fold mirrors before the eyes were on single-axis translation and rotational stages that  
105 could be operated electronically to correct for interpupillary distance and binocular  
106 vergence angle. Power incident at each cornea was 200  $\mu$ W. The light reflected by the retina  
107 was detected in the transmitted portion of the 50:50 beam splitter in a single  
108 photomultiplier tube (H7422-50, Hamamatsu Photonics, Hamamatsu, Japan), placed behind  
109 a confocal pinhole (pinhole diameter = 50  $\mu$ m, equaling 0.9 Airy disk diameters). PMT output  
110 signals were sampled at 20 MHz by a field programmable gate array (FPGA) in custom  
111 software (ICANDI, available at <https://github.com/C-RITE>) to produce 512x512 pixel video  
112 frames at 29.3 Hz.

## Binocular FEM with bsLO

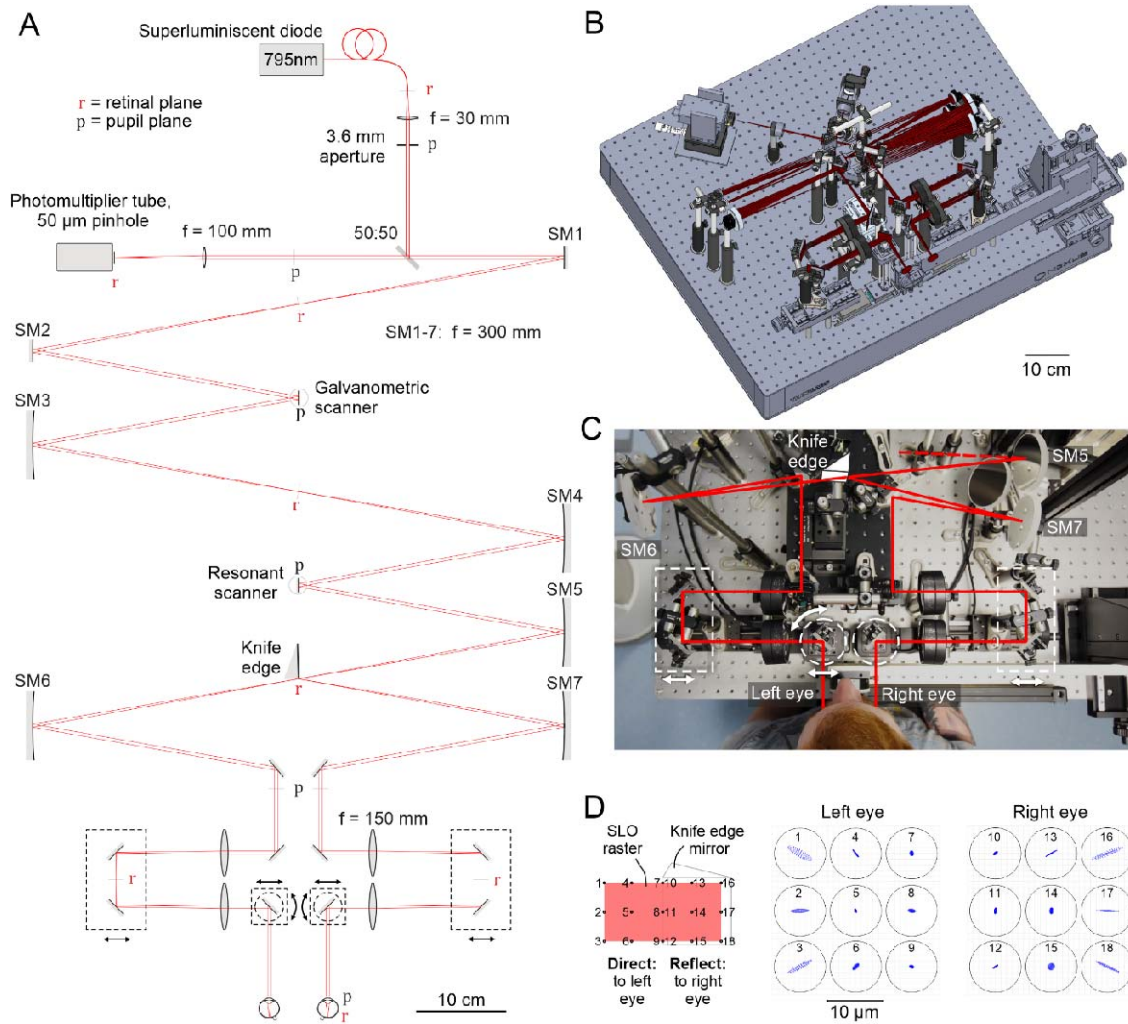

113

114 **Figure 1** | Binocular scanning laser ophthalmoscope (bsLO). **A:** Schematic drawing of the bsLO setup.  
 115 Components are drawn to scale; the beam path is shown unfolded for clarity (compare **B** for actual  
 116 beam path). Translation and rotation stages marked by dashed lines. Scale is given along the  
 117 direction of beam propagation. **B:** Three-dimensional model of the actual beam path and  
 118 optomechanical components. **C:** Top view photograph of the front-end with indication of beam  
 119 paths for both eyes and position of moveable stages. **D:** Simulated spot diagrams at the 18 cardinal  
 120 points of the bsLO raster, spanning square imaging fields in the two eyes. Circles indicate Airy disk  
 121 diameter.

122

Binocular FEM with bSLO

123 *Eye motion extraction from bSLO videos*

124           Due to the field-split design of the bSLO, a single video frame consisted of two half  
125 images of each retina recorded side-by-side (**Fig. 2A**). Because of the equal aspect ratio in  
126 the FPGA digital sampling and the rectangular optical scanning field with an aspect ratio of  
127 1:2 (horizontal:vertical), retinal image space in each half-image was compressed along the  
128 horizontal dimension two-fold. Digital resolution was 84 pixels/degree in the horizontal  
129 direction and 168 pixels/degree in the vertical direction. This anisotropy was compensated  
130 later by multiplying horizontal motion signals by 2. Binocular eye motion extraction was  
131 achieved by an offline strip-wise image registration described earlier of each half-field  
132 independently ([Stevenson, Roorda & Kumar, 2010](#)). In brief, half images were divided into  
133 32 horizontal strips, each 16 pixels high, and registered to a high-definition reference frame,  
134 generated automatically from a longer video sequence (**Fig. 2B**). This produced a high-  
135 resolution eye motion trace with 960 Hz temporal sampling frequency. From each video,  
136 horizontal and vertical motion traces of both eyes were further analyzed. In those traces,  
137 microsaccades were semi-manually labelled by first thresholding motion velocity, and then  
138 validating each candidate saccade manually (**Fig. 2C**). By setting a velocity threshold at 0.25  
139 arcmin/ms in a moving average of 7 positional samples, a candidate microsaccade was  
140 detected. The precise temporal onset of such candidate was then found at the first sample  
141 exceeding a velocity of 0.25 arcmin/ms in a moving average of 3 data samples within a 1  
142 frame window around this sample. Microsaccade offset was determined similar to onset, at  
143 the first sample where positional velocity dropped below 0.25 arcmin/ms in a moving  
144 average of 3 data samples after onset. All candidate microsaccades were manually  
145 validated. In the horizontal direction, eye movements shifting gaze to the right were  
146 expressed by positive value changes. In the vertical, positive value changes mean gaze  
147 upwards (both directions in the visual field as seen from behind the participant).

## Binocular FEM with bSLO

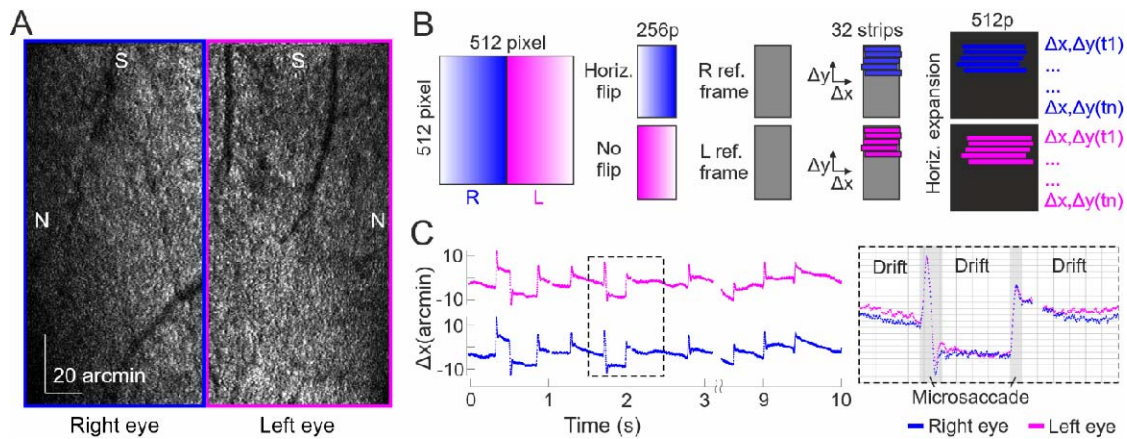

148

149

**Figure 2** | Eye motion extraction from bSLO imagery. **A**: Single bSLO video frame while the

150

participant fixated on the upper right corner of the scanning raster in both eyes. Note that the right

151

eye's image is horizontally flipped due to the scan geometry and beam folding (S: superior, N: nasal

152

on the retina). **B**: Half-images in single bSLO frames were separated and brought into fundus

153

orientation before strip-wise image registration. Horizontal image shifts were multiplied by 2 to

154

account for the unequal image aspect ratio. **C**: Example retinal motion traces of left and right eyes

155

(horizontal motion only).

156

157

### *Estimation of cyclotorsional eye motion*

158

Positional eye motion traces resulted from strip-wise image translations relative to a

159

reference image. If the acquired image is however rotated against that reference, e.g.

160

during cyclotorsional movement of the eye, eye motion traces will contain an additional

161

horizontal component beating at frame rate, resembling a sawtooth pattern. This particular

162

rotational artifact is pronounced in the horizontal dimension due to the predominantly

163

horizontal geometry of the image strips (**Fig. 3A**). By computationally rotating the reference

164

image prior to the strip-wise image correlation systematically, we found a linear relationship

165

between the slope at which horizontal strip offsets appeared at frame rate. We selected a

166

total of 604 bSLO video frames from different viewing conditions and eyes where no

167

rotation artifact was visible. Reference images were rotated within the interval 0 to 30

168

arcmin. From this, we derived a factor of 3.77 between the measured gradient in horizontal

169

positional motion traces (in arcmin per frame) and angle of image rotation (in arcmin) (**Fig.**

170

**3B**). The slope of the horizontal motion trace was measured frame-wise using a linear fit to

171

all samples within one frame and converted to image rotation by the aforementioned



## Binocular FEM with bsLO

172 factor. Cyclotorsion signals could thus be derived at frame rate in all bsLO eye motion  
173 traces. Due to the large change in slope during a microsaccade, these epochs were excluded  
174 from cyclotorsional analysis (**Fig. 3C**). Motion trace slope that was due to simultaneous drift  
175 was separated from torsion signals. For this, the drift slope was calculated by the difference  
176 of the mean drift per frame and then subtracted from the torsion slope, leaving the isolated  
177 torsion value. Throughout this paper, positive torsional values correspond to clockwise eye  
178 rotation as seen from behind the participant.

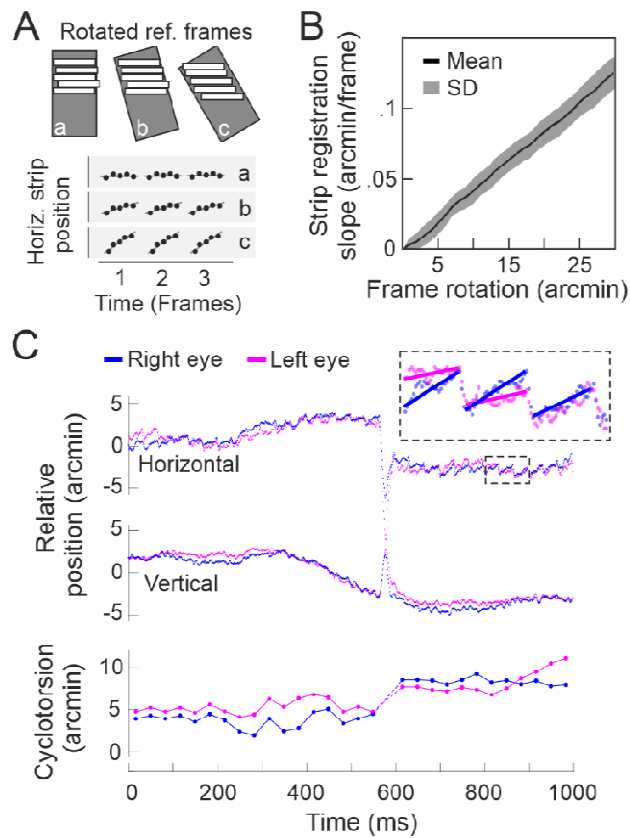

179

180 **Figure 3** | Estimation of cyclotorsional eye motion. **A:** Strip-wise image correlation to a rotated  
181 reference frame produces a sawtooth pattern in the horizontal position signal, with the slope being  
182 a function of frame rotation. **B:** By computationally rotating the reference frame in a number of  
183 image sequences that contained no sawtooth pattern, a linear relationship between strip gradient  
184 and rotation angle was determined per frame. **C:** Exemplary torsional analysis with the sawtooth  
185 pattern highlighted in the inset. Typically, torsion signals changed with a microsaccade.

186

Binocular FEM with bSLO

187 *Assessment of binocular FEM*

188 Binocular fixational eye movements (bFEM) were measured in six healthy volunteers  
189 (one female, five males, mean age: 34), referred to as P1 to P6 throughout the manuscript.  
190 Participant naming was based on a decreasing order of the magnitude of fixational stability,  
191 with P1 exhibiting the lowest average binocular deviance iso-contour areas (see **Results**).  
192 Refractive state was measured by an auto-refractor and was between -0.125 and -3  
193 diopters best spherical equivalent. While the participant's head was immobilized in front of  
194 the bSLO by a dental impression (bite bar) held on a XYZ-translation stage, they were asked  
195 to fixate on the top right corner of the individual scan raster seen by each eye as relaxed  
196 and accurate as possible. To facilitate observer alignment in front of the system, the  
197 transversal position of the last fold mirrors was adjusted to accommodate interpupillary  
198 distance (IPD). IPD adjustment and observer head positioning followed a simple protocol.  
199 First, observer IPD was measured with a handheld digital pupillometer. This reading was  
200 entered into a custom written software that controlled the movable stages electronically,  
201 and the last fold mirrors travelled to the prescribed distance, symmetrically about the  
202 systems center. When the observer then sat in front of the system, only minor  
203 misalignments remained, which could be corrected promptly. First, a possible vertical  
204 asymmetry of the observer pupil position relative to the parallel system beams was  
205 corrected by rotating the gimbal mount which held the bite bar. This head rotation was only  
206 necessary for one of the participants (at 2 degrees). In this case, the optimal rotation angle  
207 could be found by observing relative bSLO image brightness while the head was moved  
208 along the vertical direction via the x,y,z-stage. If the two half images reached maximum  
209 brightness at different heights (e.g. right eye lower), the gimbal had to be rotated  
210 accordingly (right eye down). A remaining small horizontal asymmetry in pupil position was  
211 more common and easily corrected by translation of the whole head relative to the two  
212 beams via the x,y,z-stage. Binocular vergence of the last fold mirror of the bSLO was set to  
213 either 0, 1, 2, 3, 4 or 5 degrees for each video, in ascending or descending order for half of  
214 the subjects, respectively. This was done to both test feasibility of such experimental option  
215 and to put a vergence load onto the motor system to trigger differences in FEM dynamics.  
216 Five ~10-second long bSLO videos were recorded at each viewing condition (one video  
217 comprised 300 frames = 10.24 s). Pupils were dilated by instilling one drop of 1 %  
218 Tropicamide 15 minutes before the beginning of the recording session. Written informed

Binocular FEM with bsLO

219 consent was obtained from each participant and all experimental procedures adhered to the  
220 tenets of the Declaration of Helsinki, in accordance with the guidelines of the independent  
221 ethics committee of the medical faculty at the Rheinische Friedrich-Wilhelms-Universität of  
222 Bonn, Germany.

223 **Results**

224 **Binocular coordination of fixational eye movements**

Binocular FEM with bsLO

225 In all six participants (P1-P6), binocular FEM were derived from thirty ~10-second

## Binocular FEM with bsLO

226 videos during six different binocular vergence angles (5 in each condition). In each video,

Binocular FEM with bsLO

227 horizontal and vertical movements of both eyes were extracted at 960 Hz, torsion was

Binocular FEM with bSLO

228 extracted at 30 Hz (see Methods). After removing video frames containing eye blinks and

Binocular FEM with bsLO

229 frames that could not be registered to the reference frame (due to out of field motion and



Binocular FEM with bSLO

230 other registration errors), we arrived at a total of 1,564,640 samples collected for  
231 transversal movement for all eyes combined, and after an additional exclusion of

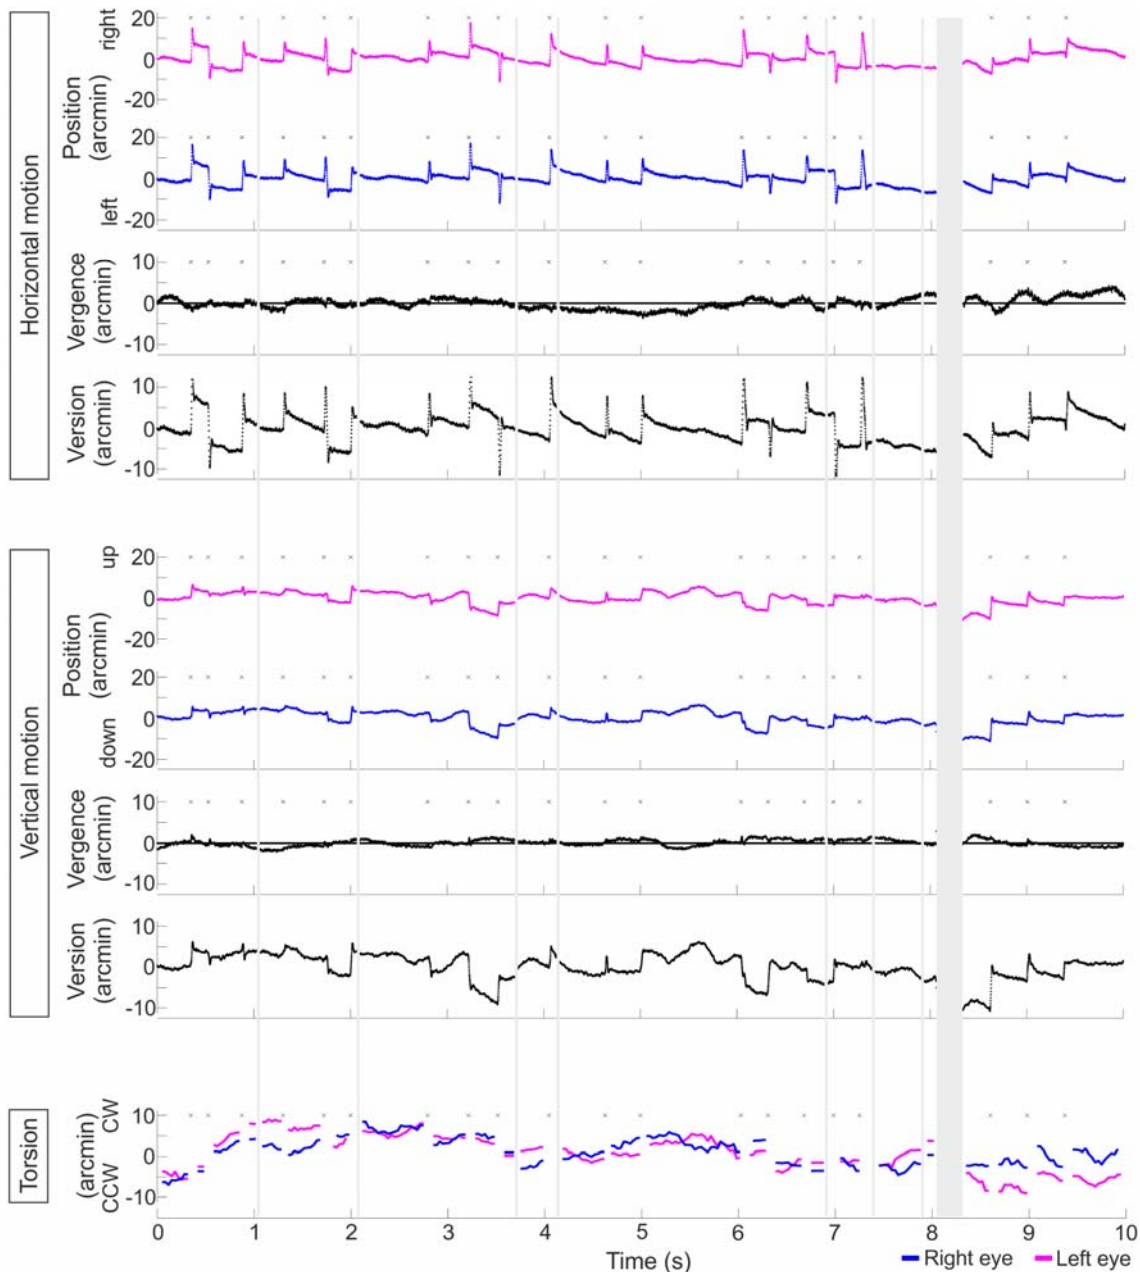

232 microsaccade epochs, at a total of 37,228 samples for torsional movement. Across all eyes  
233 and conditions, positional resolution was high. The variance between adjacent positional  
234 samples around a moving average of 10 samples was a tenth of an image pixel, equaling  
235 0.07 arcmin in x-direction and 0.04 arcmin in y-direction. Relative vergence and version  
236 were computed by subtracting or averaging the left and right eye motion traces,  
237 respectively (an example data set is shown in **Fig. 4** of P4 at a vergence angle of 2° degree).

## Binocular FEM with bSLO

238

239 **Figure 4** | Exemplary binocular eye motion traces. Data is from a single 10-second video recorded in  
240 P6 at two-degree vergence angle. Ten of such videos were recorded per viewing condition per  
241 participant. Colors indicate fellow eyes (left = magenta, right = blue). Horizontal, vertical and  
242 torsional movements are shown separately. Note that for horizontal and vertical movements,  
243 positional distances are reported (in arcmin), while for torsion, angular rotation is reported (also in  
244 arcmin). Small asterisks indicate the occurrence of a microsaccade for which torsion was undefined.  
245

246 In general, binocular eye coordination was high for all subjects across all conditions. The  
247 average vergence motion (computed as L-R position signals) was 1.18 arcmin (standard  
248 deviation, SD: 1.21 arcmin) in the horizontal, and 0.56 arcmin (SD: 0.53 arcmin) in the  
249 vertical direction. Within 4,052 total microsaccades detected across all subjects, we did not  
250 observe a monocular microsaccade, i.e. one that was present only in one eye. Microsaccade  
251 frequency varied across participants (average microsaccades per second, P1: 1.12, P2: 0.71,  
252 P3: 0.62, P4: 1.68, P5: 1.41). Temporal microsaccade onset difference between eyes was  
253 distributed normally around an average of 1.03 ms (SD: 1.23 ms). The main sequence of  
254 microsaccades, defined as the relationship between peak velocity and excursion amplitude  
255 showed a typical linear relationship in log-log plotting, with an average slope of  $0.073 \text{ ms}^{-1}$   
256 <sup>1</sup> across eyes, equal for fellow eyes (Pearson's correlation between the left and right eye  
257  $>0.99$  for all subjects). Microsaccade amplitude and direction were firmly coupled between  
258 the two eyes (**Fig.5**). Microsaccade amplitude range across all participants was 2.04 to 31.3  
259 arcmin, median amplitude was 13.46 arcmin (N= 4052). The amplitude deviance between  
260 left and right (L-R) had a mean of -0.2 arcmin and standard deviation of 1.7 arcmin (Range: 0  
261 – 12.74 arcmin). The mean polar direction deviance was 0.39 degrees, with a standard  
262 deviation of 3.68 deg, and a range of 1.32 arcmin to 10.15 deg. Drift amplitudes ranged from  
263 0 to 7.15 arcmin, median amplitude was 2.16 arcmin (N= 7244). Here, the largest absolute  
264 amplitude deviance between left and right was 5.8 arcmin (mean: 0.83 arcmin, SD: 0.77  
265 arcmin). The mean direction deviance was 0.54 degrees, with a standard deviation of 34.65  
266 deg, and a range of 0 arcmin to 97.82 deg.

267 Across all eyes and viewing conditions, more horizontally oriented microsaccades were  
268 performed. Drift direction was mainly pointing down and left, a bias likely induced by the  
269 positioning of the fixation target at the upper right corner of the imaging raster.

270

Binocular FEM with bSLO

271

272

273

274

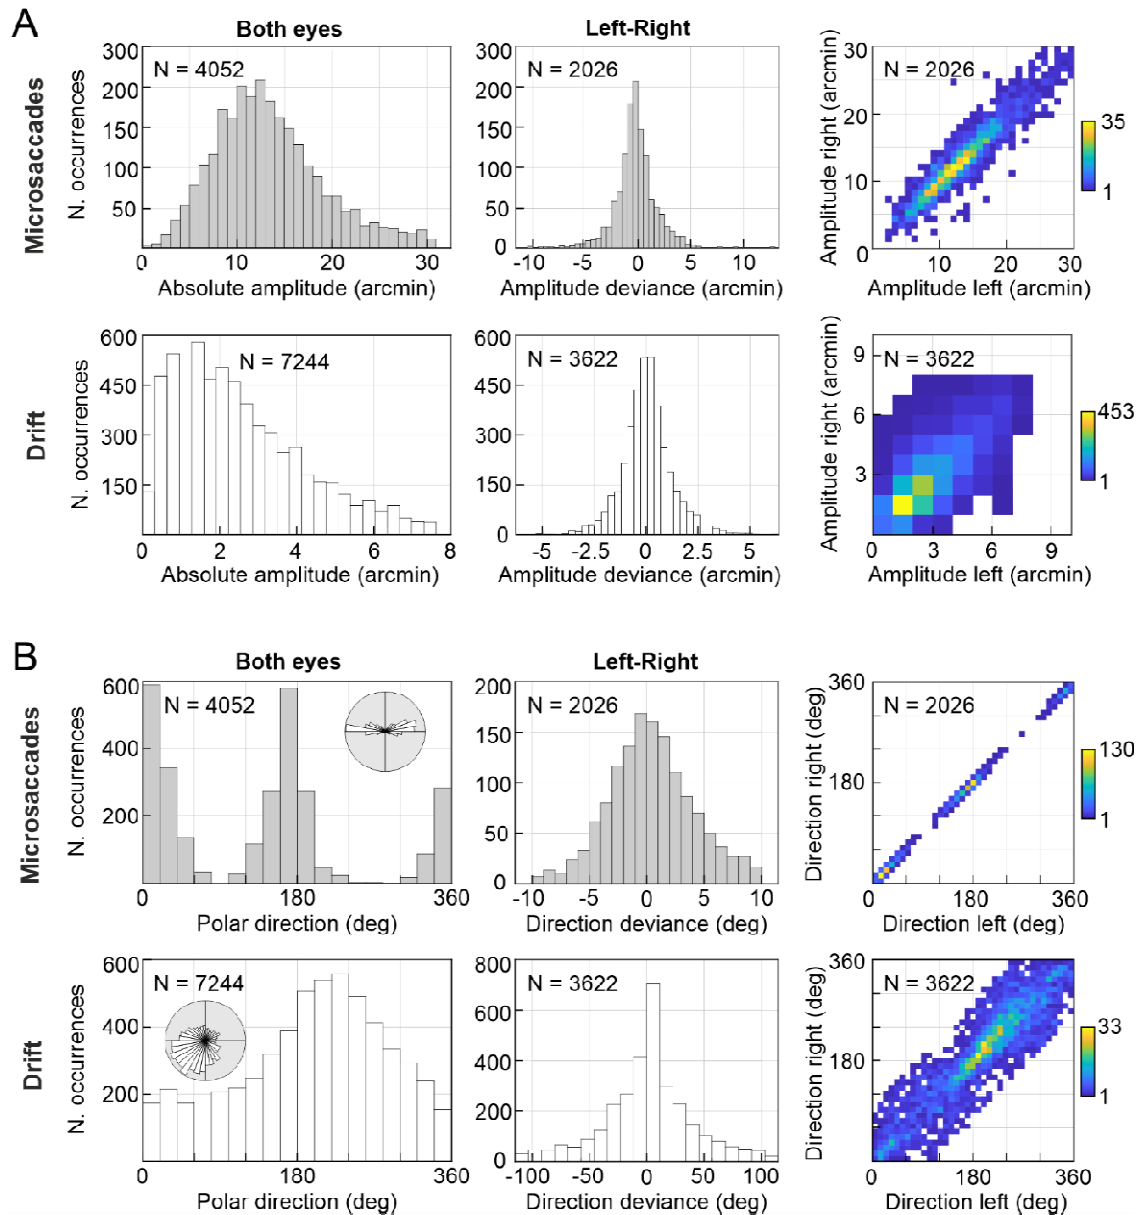

275

276

277 **Figure 5** | Binocular coupling of microsaccades and drift. A: Analysis of microsaccade and drift  
278 amplitude. First column is the histogram of all absolute motion amplitudes, middle column is the  
279 histogram of left and right eye amplitude deviances (computed by left-right amplitudes), and third

## Binocular FEM with bsLO

280 column is the amplitude correlation between all fellow eyes. B: Analysis of microsaccade and drift  
281 direction in the visual field (0 deg = right, 90 deg = up). The columns are the same as in A. The small  
282 inset in the direction histogram show the same data in polar coordinates for reference.

283

284 In an analysis of fixation stability, expressing all retinal landing points of the fixated  
285 object in a two-dimensional plot as their iso-contour area (ISOA, encompassing 68% of all  
286 data points), a corresponding relationship emerged (**Fig. 6**). While the magnitude of  
287 monocular ISOAs differed between participants (average ISOA: P1: 15.62 arcmin<sup>2</sup>, P2: 24.97  
288 arcmin<sup>2</sup>, P3: 27.04 arcmin<sup>2</sup>, P4: 28.46 arcmin<sup>2</sup>, P5: 29.57 arcmin<sup>2</sup>, P6: 31.02 arcmin<sup>2</sup>), fellow-  
289 eye ISOAs were similar (Pearson's correlation between ISOAs of the left and right eye for  
290 each participant: P1:  $\rho=0.78$ , P2:  $\rho=0.84$ , P3:  $\rho=0.79$ , P4:  $\rho=0.62$ , P5:  $\rho=0.61$ , P6:  $\rho=0.96$ , all  
291  $p < 0.01$ ). Binocular deviance ISOAs (L-R) were always smaller than monocular ISOAs  
292 (average: 3.48 to 8.04 arcmin<sup>2</sup>, P1 to P6, respectively, average range of monoISOA: binoISOA  
293 = 4.52 at binocular vergence of 0°). Binocular deviance ISOAs, unlike monocular ISOAs, were  
294 elongated in the horizontal direction, being on average 2.2 times wider than high. We  
295 observed a weak yet statistically insignificant trend of increasing monocular ISOAs with  
296 larger vergence angles set in the bsLO. However, binocular coupling did not seem to be  
297 systematically disturbed by the vergence induced. In all participants, and across all vergence  
298 angles, binocular fixation stability (L-R) was always lower than monocular fixation stability  
299 (average ISOA ratio mono/bino deviance, 0°: 4.98, 1°: 7.16, 2°: 8.29, 3°: 8.78, 4°: 7.13, 5°:  
300 7.93).

301

302

Binocular FEM with bSLO

303

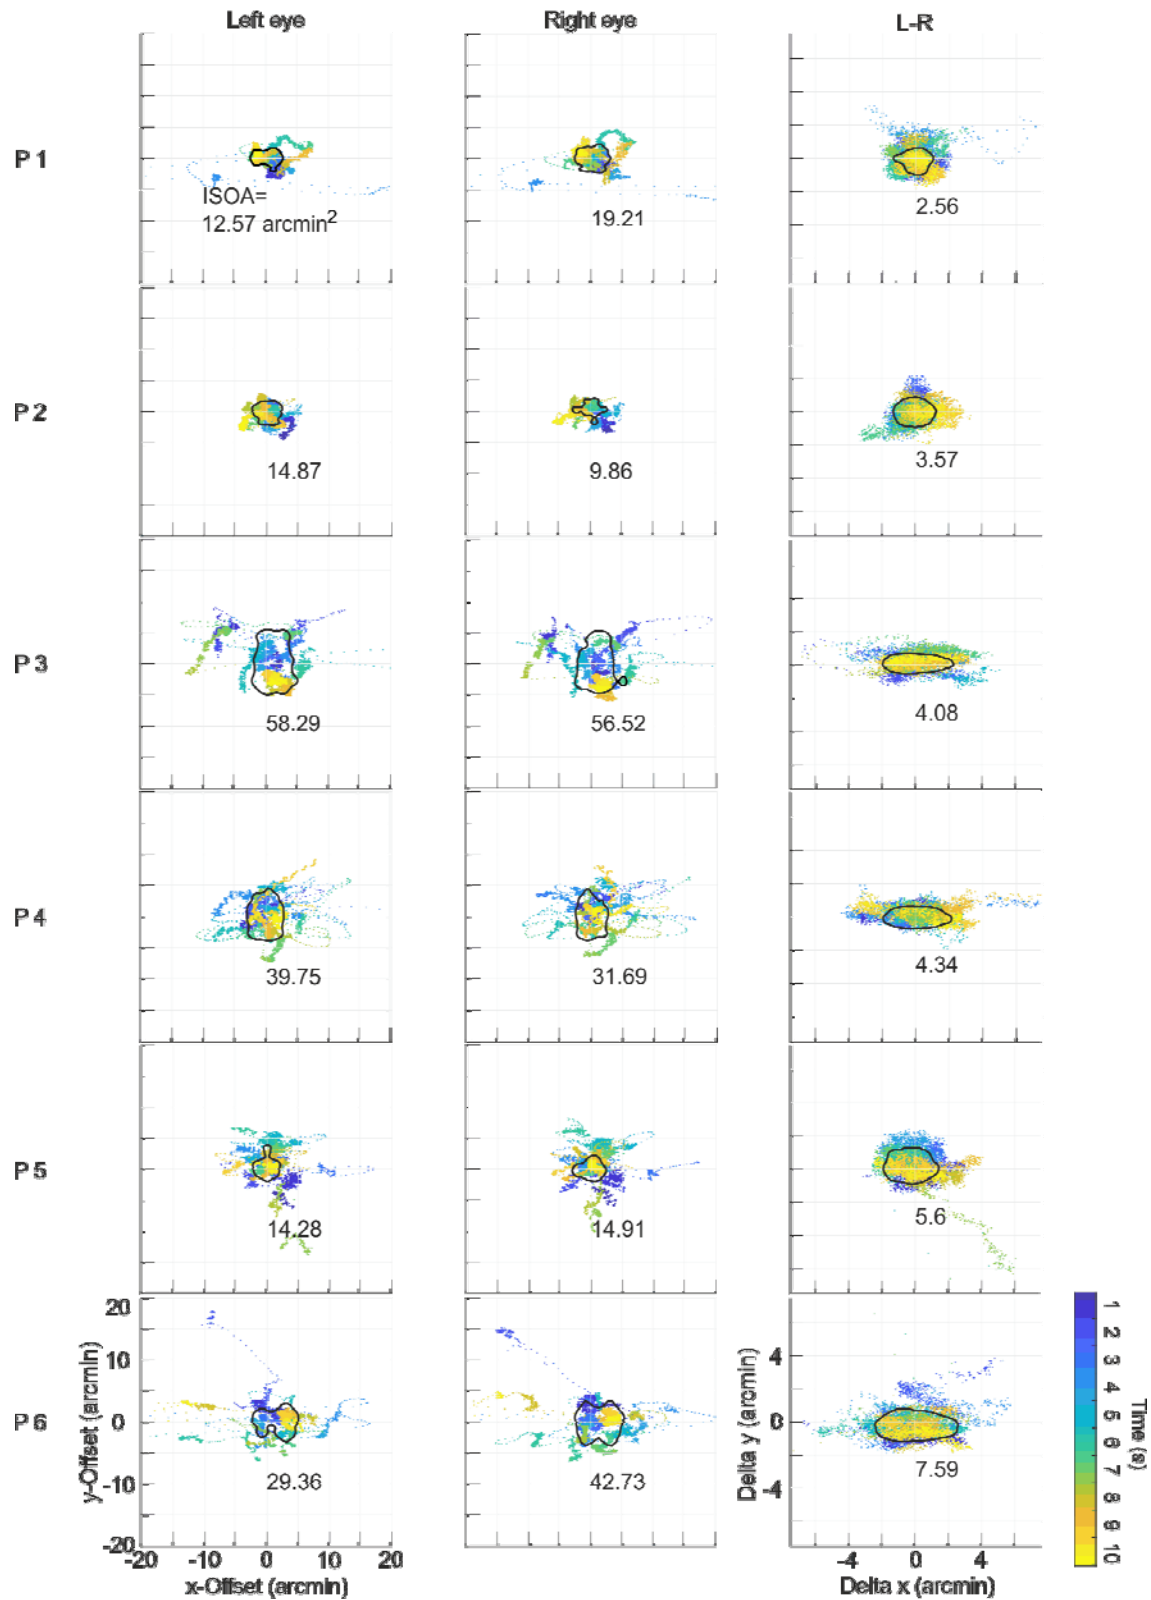

304

305

306

**Figure 6** | Monocular and binocular fixational stability. Data is from one 10-second video at 0 deg vergence angle for all participants (P1-P6). Fixation target was the corner of the 3x3 degree scanning

## Binocular FEM with bsLO

307 raster. Time is color coded. The ISOAs (black outline) are given in arcmin<sup>2</sup>. Note that the scale has  
308 been magnified for the binocular deviance (L-R) data set 2.5-fold.  
309

## 310 Cyclotorsion during fixational eye motion

311 From the computationally rotated reference frame analysis we could derive a variance of  
312 strip offset for each rotational angle. The smallest strip offset which could be observed had  
313 a spatial distance of 0.7 arcmin, derived from the smallest possible slope of the sawtooth  
314 pattern measured. The smallest torsional signal which could be measured had a rotational  
315 angle of 0.6 arcmin. The square root of the average angular variance (SD: 0.47 arcmin) was  
316 multiplied by 2.77 to arrive at a repeatability of 1.3 arcmin. Measurement error was thus  
317 0.92 arcmin (variance multiplied by 1.96). Across all eyes and viewing conditions, torsional  
318 angles between -22.9 and 21.6 arcmin were observed (average: 0.53 arcmin, SD: 5.36  
319 arcmin). The largest absolute amplitude deviance between left and right was 11.5 arcmin  
320 (mean: 1.57 arcmin, SD: 1.44 arcmin) (**Fig. 7 A**). Out of all torsion signals (N= 74,456), 36,202  
321 were in counterclockwise direction while 38,254 were in clockwise direction. A linear fit  
322 to a correlation of left and right eyes' torsion demonstrated tight coupling (mean slope = 1.05,  
323  $\sigma^2 = 0.0005$ ) (**Fig. 7 B**). Similar to the metrics of fixation stability and frequency of  
324 microsaccades, the distribution of torsional motion was idiosyncratic across participants  
325 (**Fig. 7 C**).

326 As a further observation, torsional motion corresponded to horizontal and vertical  
327 movement patterns of fixational eye movements, with gradual changes during drift and  
328 abrupt changes during saccades. The average torsional velocity change during a  
329 microsaccades was 2.32 arcmin/ms (SD: 1.57 arcmin/ms, Range: 0 - 7.56 arcmin/ms).  
330 Between microsaccades, i.e. during drift, the average torsional velocity change was 0.09  
331 arcmin/ms (SD: 0.08 arcmin/ms, Range: 0 - 0.34 arcmin/ms).

Binocular FEM with bSLO

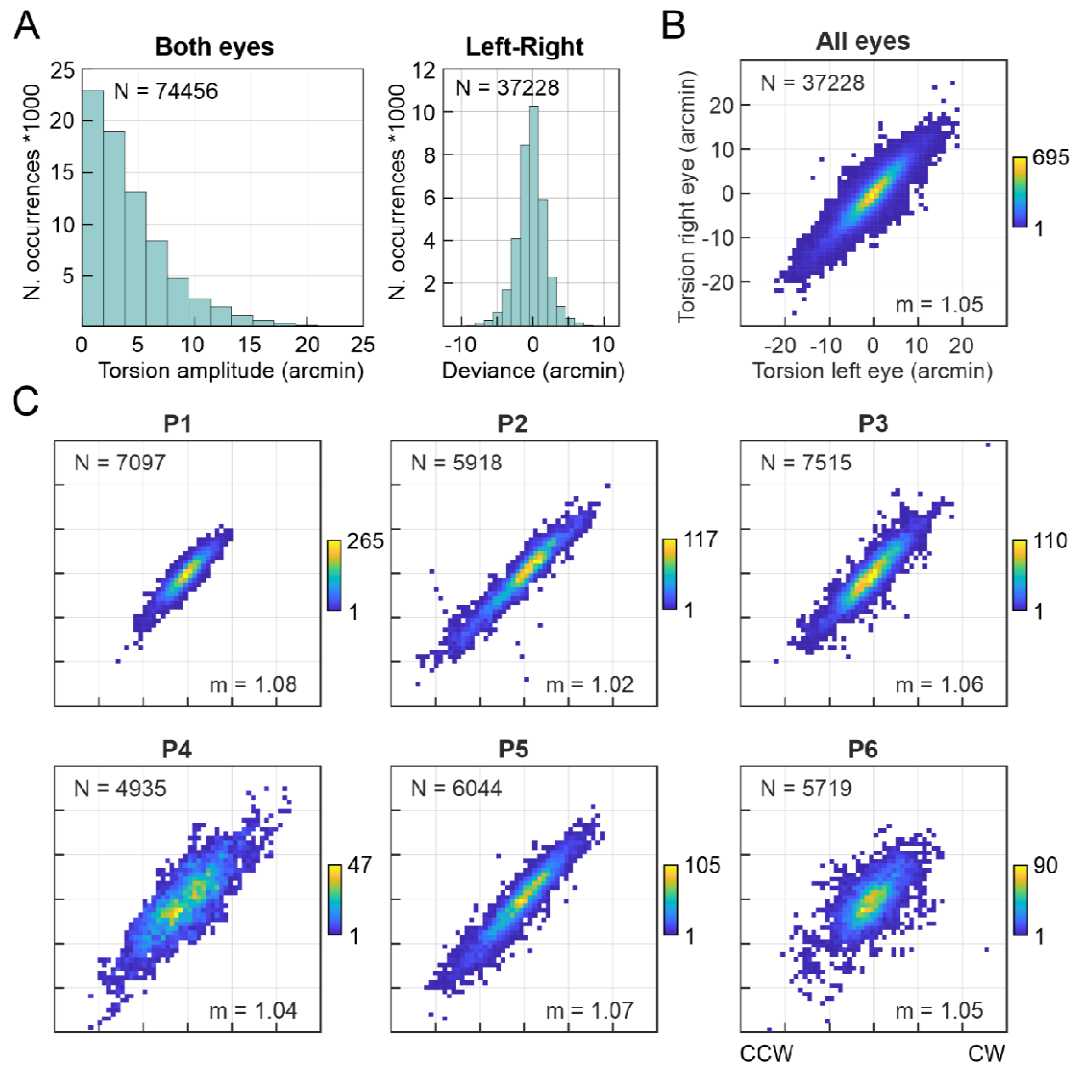

332

333 **Figure 7** | Coupling of cyclotorsion between fellow eyes. A: Histogram of the frame-wise torsion  
334 amplitudes of all eyes and participants and torsional amplitude deviance between all fellow eyes  
335 (computed as left-right). B: Correlation of torsional amplitudes across all eyes. Positive values  
336 represent clockwise, negative values represent counter-clockwise rotation. Data has been binned to  
337 1 arcmin squares and are color coded for the number of occurrences in each bin. C: The same as in  
338 B, shown for each participant individually (P1-P6).

339 **Discussion**

340 We demonstrate an improved design of a split-field binocular scanning laser  
341 ophthalmoscope for high-resolution measurement of fixational eye movements. For  
342 validation, binocular fixational eye movements including cyclotorsion were assessed in six  
343 healthy participants.

## Binocular FEM with bSLO

344 The instrument described here offers some technical improvements to a similar split-field  
345 binocular SLO that was demonstrated earlier ([Stevenson, Sheehy & Roorda, 2016](#)). First, 3 x  
346 3-degree imaging fields were used, allowing observation of larger eye movements.  
347 Fixational eye movements range from  $\sim 11$ -60 arcsec (Tremor) to  $7.5 \pm 1.5$  arcmin  
348 (Microsaccades) ([Bowers, Boehm & Roorda, 2019](#); [Montes, Bennett, Bensinger, Rani,](#)  
349 [Sherkat, Zhao & Sheehy, 2022](#)), which would put our method in the position to cover most  
350 fixational situations while the larger imaging rasters can be used as a retinal display system  
351 for retina-contingent visual psychophysics ([Yang, Arathorn, Tiruveedhula, Vogel & Roorda,](#)  
352 [2010](#)). Two independent Badal optometers allowed correction of ocular lower order  
353 aberrations, the largest factor reducing image quality in ophthalmic imaging ([Steven, Sulai,](#)  
354 [Cheong, Bentley & Dubra, 2018](#)). This will allow to increase observation numbers in normal  
355 participants and patients, given that eyes do not have to be preselected based on favorable  
356 refractive states. Interpupillary distance could be adjusted using motorized platforms, which  
357 together with an optional pupil monitor camera allowed relatively easy and quick binocular  
358 alignment. This is likely to increase imaging and workflow efficiency by decreasing chair  
359 time. Finally, binocular vergence angles could be independently induced by motorized  
360 rotation platforms, adding experimental options for binocular vision science experiments.  
361 Our system was built and optically optimized to accommodate a second light channel in the  
362 future for multi-wavelength binocular micro-stimulation ([Harmening, Tuten, Roorda &](#)  
363 [Sincich, 2014](#)).

364

365 Similar to other monocular SLO tracking systems ([Sheehy, Yang, Arathorn, Tiruveedhula,](#)  
366 [Boer & Roorda, 2012](#)), we could demonstrate high temporal and spatial resolution for both  
367 horizontal and vertical eye motion estimation in both eyes. Given the split-field design in our  
368 system, the right and left eye's image content is recorded quasi-simultaneously, removing  
369 the need of temporal synchronization. In reality, the right and left signals are recorded  
370 block-wise (R, L, R, L, ...), with a constant temporal offset between right and left signal  
371 onsets equal to half of the line rate ( $\sim 6.7 \mu\text{s}$ ), which is less than 0.5% of the temporal  
372 sampling rate of about 1 ms, and thus negligible.

373 With SLO-based retinal tracking, [Stevenson, Roorda & Kumar \(2010\)](#) measured vertical  
374 vergence during steady fixation with a standard deviation of 1–2 arcmin. Horizontal  
375 vergence had more variability, ranging from 2 to 10 arcmin. We measured an average



## Binocular FEM with bSLO

376 vergence motion of 1.18 arcmin (SD: 1.21 arcmin) in the horizontal, and 0.56 arcmin (SD:  
377 0.53 arcmin) in the vertical direction. [Bowers, Boehm & Roorda \(2019\)](#) used an AOSLO and  
378 found the standard deviation of motion signals to be  $5.10 \pm 0.66$  arcseconds horizontally  
379 and  $5.51 \pm 0.57$  arcseconds vertically during steady fixation. Average microsaccade  
380 amplitude was measured at  $7.5 \pm 1.5$  arcmin and average drift amplitude at  $3.8 \pm 0.9$  arcmin.  
381 Our position signals had a standard deviation of 4.79/2.58 arcsec (horizontal/vertical), and  
382 average microsaccade amplitude of 13.46 arcmin and an average drift amplitude of 2.16  
383 arcmin. Measurement performance was thus similar to invasive tracking. For instance, [Riggs  
384 & Ratliff \(1951\)](#) mounted mirrors on plastic contact lenses fitted directly to the moving  
385 eyeball. The system was able to record eye movements (horizontal, vertical, and torsional  
386 components) smaller than one arc minute. Dual Purkinje image tracker ([Cornsweet & Crane,  
387 1973](#); [Crane et al., 1985](#)) use a non-invasive optical method and achieve a precision of  
388 around 1 arcmin. For an excellent comparative overview of eye motion measurement  
389 precision across techniques see [Sheehy et al. \(2012\)](#).

390 While temporal and spatial resolution of SLO-based retinal tracking is equal or superior to  
391 commercial video based binocular eye trackers, they will only track motion amplitudes that  
392 are on the order of the imaging field size. Eye motion that produces image content with  
393 insufficient overlap to a common reference frame cannot be estimated reliably with such a  
394 system ([Stevenson, Roorda & Kumar, 2010](#)). This makes SLO-based retinal tracking ideal to  
395 study fixational eye motion, given their smaller amplitude ([Rolfs, 2009](#)). If image acquisition  
396 in a retinal imager is fast enough, temporally adjacent video frames can contain sufficient  
397 spatial overlap that removes the need of a common reference frame, and thus allows out-  
398 of-field tracking ([Szkulmowski et al., 2020](#)). Such an approach may offer, on the other hand,  
399 not enough spatial resolution to resolve retinal structure of interest, which may be  
400 important if gaze behavior and retinal cell topography is wished to be linked ([Reiniger,  
401 Domdei, Holz & Harmening, 2021](#); [Ratnam, Domdei, Harmening & Roorda, 2017](#);  
402 [Harmening, Tuten, Roorda & Sincich, 2014](#))

403

404 Our data allowed analysis of the binocular coupling of FEM. With regard to microsaccades, it  
405 is widely accepted that they follow the same kinetics as other saccades ([Zuber, Stark &  
406 Cook, 1965](#)), establishing a microsaccade-saccade continuum that extends to free-viewing

## Binocular FEM with bSLO

407 conditions (see, for example, [Otero-Millan, Troncoso, Macknik, Serrano-Pedraza &](#)  
408 [Martinez-Conde, 2008](#)). Whether microsaccades occur as a cyclopic phenomenon or could  
409 be generated monocularly is part of an ongoing debate in eye movement research: while  
410 early and recent studies using contact lens-based eye-tracking or binocular recordings from  
411 high-resolution search coil or Dual-Purkinje-image eye-tracking systems reported that  
412 microsaccades were highly conjugate between the two eyes ([Krauskopf et al, 1960](#); [Schulz,](#)  
413 [1984](#); [Fang, Gill, Poletti, & Rucci, 2018](#)), several recent reports from video-based eye  
414 tracking studies showed and discussed the existence and prevalence of monocular  
415 microsaccades (see for example: [Engbert & Kliegl, 2003](#); [Martinez-Conde, Macknick,](#)  
416 [Troncoso, & Dyar, 2006](#); [Gautier, Bedell, Siderov, & Waugh, 2016](#); but also: [Kloke, Jaschinski,](#)  
417 [Jainta, 2009](#); [Moller, Laursen, Tygesen & Sjolie, 2002](#) and [Holmqvist & Blignaut, 2020](#) for  
418 methodological issues). Our data adds to this debate in favour for highly conjugate  
419 microsaccades: true monocular microsaccades were not present in our data.

420 In this work, cyclotorsional motion during fixation was extracted by analysis of the sawtooth  
421 pattern artifact in the horizontal movement track, as suggested in prior studies ([Stevenson,](#)  
422 [Roorda & Kumar, 2010](#); [Bowers, Boehm, & Roorda, 2019](#)). After calibrating this linkage with  
423 image data that contained artificial rotation (see Methods), cyclotorsional movement could  
424 be estimated with an angular resolution of less than 1 arcmin. We note however that SLO-  
425 based torsion signals are theoretically confounded by the same artifacts as position signals  
426 are. High-speed motion path estimation from strip-wise image registration in a scanning  
427 system makes use of the fact that eye motion causes image distortions in each frame. This is  
428 because retinal structures are captured in a continuously updating (scanning) video frame as  
429 they move, and because the scanning speed is slower than the fastest occurring retinal  
430 motion. At the same time, such intra-frame image distortions pose a limit to creating a true,  
431 i.e. undistorted, representation of the unmoving retina. Because intra-frame distortions will  
432 be present in the image material used to construct a reference frame, their spatial signature  
433 will then show up in the motion path itself. Distortion-free reference frame generation is an  
434 ongoing topic in SLO-based eye motion research ([Shenoy, Fong, Tan, Roorda & Ng, 2021](#);  
435 [Bedggood & Metha, 2017](#); [Bedggood & Metha, 2019](#)), and accurate torsion estimation, like  
436 position estimation, will benefit from its success.

## Binocular FEM with bsLO

437 We found that torsional motion was, like microsaccades and drift, largely coupled between  
438 the two eyes, and, in accordance with earlier work, often occurred with or immediately  
439 after a saccade ([Murdison, Blohm & Bremmer, 2019](#)). Thus, our data tentatively suggests  
440 that torsional eye movements correct slight misallocations of the eyes after saccades  
441 ([Howard, 2012](#)) in a conjugate fashion. More data for different fixation stimuli is clearly  
442 needed to evaluate the functional role of such fixational eye movements in respect of single  
443 eye or binocular coordinated processes. The presented binocular scanning laser  
444 ophthalmoscope promises to be an apt setup for such research.

445

## 446 [Acknowledgements](#)

447 We thank Austin Roorda and Pavan Tiruveedhula for technical resources. This study was  
448 funded by a research grant of the Dr. Eberhard and Hilde Rüdiger Stiftung (BINOSLO), and by  
449 the Emmy Noether-Program of the German Research Foundation (DFG, Ha 5323/5-1,2).

Binocular FEM with bsLO

450 **References**

- 451 Barlow, H. B. (1952). Eye movements during fixation. *The Journal of Physiology*, 116(3), 290,  
452 <https://doi.org/10.1113/jphysiol.1952.sp004706>.
- 453 Bedgood, P., & Metha, A. (2017). De-warping of images and improved eye tracking for the scanning  
454 laser ophthalmoscope. *PLoS one*, 12(4), e0174617,  
455 <https://doi.org/10.1371/journal.pone.0174617>.
- 456 Bedgood, P., & Metha, A. (2019). Mapping flow velocity in the human retinal capillary network with  
457 pixel intensity cross correlation. *PLoS one*, 14(6), e0218918,  
458 <https://doi.org/10.1371/journal.pone.0218918>.
- 459 Bowers, N. R., Boehm, A. E., & Roorda, A. (2019). The effects of fixational tremor on the retinal  
460 image. *Journal of vision*, 19(11), 8-8, <https://doi.org/10.1167/19.11.8>.
- 461 Chung, S. T., Kumar, G., Li, R. W., & Levi, D. M. (2015). Characteristics of fixational eye movements in  
462 amblyopia: Limitations on fixation stability and acuity? *Vision research*, 114, 87-99,  
463 <https://doi.org/10.1016/j.visres.2015.01.016>.
- 464 Cornsweet, T. N., & Crane, H. D. (1973). Accurate two-dimensional eye tracker using first and fourth  
465 Purkinje images. *JOSA*, 63(8), 921-928, <https://doi.org/10.1364/JOSA.63.000921>.
- 466 Crane, H. D., & Steele, C. M. (1985). Generation-V dual-Purkinje-image eyetracker. *Applied optics*,  
467 24(4), 527-537, <https://doi.org/10.1364/AO.24.000527>.
- 468 Engbert, R., & Kliegl, R. (2003). Microsaccades uncover the orientation of covert attention. *Vision  
469 research*, 43(9), 1035-1045, [https://doi.org/10.1016/S0042-6989\(03\)00084-1](https://doi.org/10.1016/S0042-6989(03)00084-1).
- 470 Fang, Y., Gill, C., Poletti, M., & Rucci, M. (2018). Monocular microsaccades: Do they really occur?.  
471 *Journal of vision*, 18(3), 18-18, <https://doi.org/10.1167/18.3.18>.
- 472 Flitcroft, D. I., Judge, S. J., & Morley, J. W. (1992). Binocular interactions in accommodation control:  
473 effects of anisometric stimuli. *Journal of Neuroscience*, 12(1), 188-203,  
474 <https://doi.org/10.1523/JNEUROSCI.12-01-00188.1992>.
- 475 Gautier, J., Bedell, H. E., Siderov, J., & Waugh, S. J. (2016). Monocular microsaccades are visual-task  
476 related. *Journal of vision*, 16(3), 37-37, <https://doi.org/10.1167/16.3.37>.
- 477 Gómez-Vieyra, A., Dubra, A., Malacara-Hernández, D., & Williams, D. R. (2009). First-order design of  
478 off-axis reflective ophthalmic adaptive optics systems using afocal telescopes. *Optics express*,  
479 17(21), 18906-18919, <https://doi.org/10.1364/OE.17.018906>.
- 480 Harmening, W. M., Tuten, W. S., Roorda, A., & Sincich, L. C. (2014). Mapping the perceptual gain of  
481 the human retina. *Journal of Neuroscience*, 34(16), 5667-5677,  
482 <https://doi.org/10.1523/JNEUROSCI.5191-13.2014>.
- 483 Holmqvist, K., & Blignaut, P. (2020). Small eye movements cannot be reliably measured by video-  
484 based P-CR eye-trackers. *Behavior research methods*, 52(5), 2098-2121,  
485 <https://doi.org/10.3758/s13428-020-01363-x>.
- 486 Howard, I. P. (2012). *Perceiving in depth, volume 1: basic mechanisms*. Oxford University Press.
- 487 Kloke, W. B., Jaschinski, W., & Jainta, S. (2009). Microsaccades under monocular viewing conditions.  
488 *Journal of Eye Movement Research*, 3(1), <https://doi.org/10.16910/jemr.3.1.2>.
- 489 Ko, H. K., Poletti, M., & Rucci, M. (2010). Microsaccades precisely relocate gaze in a high visual acuity  
490 task. *Nature neuroscience*, 13(12), 1549-1553, <https://doi.org/10.1038/nn.2663>.

Binocular FEM with bsLO

- 491 Krauskopf, J., Cornsweet, T. N., & Riggs, L. A. (1960). Analysis of eye movements during monocular  
492 and binocular fixation. *JOSA*, 50(6), 572-578, <https://doi.org/10.1364/JOSA.50.000572>.
- 493 Leigh, R. J., & Zee, D. S. (2006). The neurology of eye movements fourth edition. *CONTEMPORARY*  
494 *NEUROLOGY SERIES*, 70(1).
- 495 Martinez-Conde, S. (2006). Fixational eye movements in normal and pathological vision. *Progress in*  
496 *brain research*, 154, 151-176, [https://doi.org/10.1016/S0079-6123\(06\)54008-7](https://doi.org/10.1016/S0079-6123(06)54008-7).
- 497 Martinez-Conde, S., Macknik, S. L., & Hubel, D. H. (2004). The role of fixational eye movements in  
498 visual perception. *Nature reviews neuroscience*, 5(3), 229-240,  
499 <https://doi.org/10.1038/nrn1348>.
- 500 Martinez-Conde, S., Otero-Millan, J., & Macknik, S. L. (2013). The impact of microsaccades on vision:  
501 towards a unified theory of saccadic function. *Nature Reviews Neuroscience*, 14(2), 83-96,  
502 <https://doi.org/10.1038/nrn3405>.
- 503 McCrea, R. A., Strassman, A., May, E., & Highstein, S. M. (1987). Anatomical and physiological  
504 characteristics of vestibular neurons mediating the horizontal vestibulo-ocular reflex of the  
505 squirrel monkey. *Journal of Comparative Neurology*, 264(4), 547-570,  
506 <https://doi.org/10.1002/cne.902640408>.
- 507 Møller, F., Laursen, M., Tygesen, J., & Sjølie, A. (2002). Binocular quantification and characterization  
508 of microsaccades. *Graefe's archive for clinical and experimental ophthalmology*, 240(9), 765-  
509 770, <https://doi.org/10.1007/S00417-002-0519-2>.
- 510 Montes, S. Y. C., Bennett, D., Bensinger, E., Rani, L., Sherkat, Y., Zhao, C., ... & Sheehy, C. K. (2022).  
511 Characterizing Fixational Eye Motion Variance Over Time as Recorded by the Tracking  
512 Scanning Laser Ophthalmoscope. *Translational Vision Science & Technology*, 11(2), 35-35,  
513 <https://doi.org/10.1167/tvst.11.2.35>.
- 514 Murdison, T. S., Blohm, G., & Bremmer, F. (2019). Saccade-induced changes in ocular torsion reveal  
515 predictive orientation perception. *Journal of Vision*, 19(11), 10-10,  
516 <https://doi.org/10.1167/19.11.10>.
- 517 Murray, J., Gupta, P., Dulaney, C., Garg, K., Shaikh, A. G., & Ghasia, F. F. (2022). Effect of Viewing  
518 Conditions on Fixation Eye Movements and Eye Alignment in Amblyopia. *Investigative*  
519 *Ophthalmology & Visual Science*, 63(2), 33-33, <https://doi.org/10.1167/iovs.63.2.33>.
- 520 Otero-Millan, J., Macknik, S. L., Langston, R. E., & Martinez-Conde, S. (2013). An oculomotor  
521 continuum from exploration to fixation. *Proceedings of the National Academy of Sciences*,  
522 110(15), 6175-6180, <https://doi.org/10.1073/pnas.1222715110>.
- 523 Otero-Millan, J., Macknik, S. L., & Martinez-Conde, S. (2014). Fixational eye movements and  
524 binocular vision. *Frontiers in integrative neuroscience*, 8, 52,  
525 <https://doi.org/10.3389/fnint.2014.00052>.
- 526 Otero-Millan, J., Troncoso, X. G., Macknik, S. L., Serrano-Pedraza, I., & Martinez-Conde, S. (2008).  
527 Saccades and microsaccades during visual fixation, exploration, and search: foundations for a  
528 common saccadic generator. *Journal of vision*, 8(14), 21-21, <https://doi.org/10.1167/8.14.21>.
- 529 Poletti, M., Listorti, C., & Rucci, M. (2010). Stability of the visual world during eye drift. *Journal of*  
530 *Neuroscience*, 30(33), 11143-11150, <https://doi.org/10.1523/JNEUROSCI.1925-10.2010>.
- 531 Poletti, M., & Rucci, M. (2015). A compact field guide to the study of microsaccades: Challenges and  
532 functions. *Vision research*, 118, 83-97, <https://doi.org/10.1016/j.visres.2015.01.018>.
- 533 Ratnam, K., Domdei, N., Harmening, W. M., & Roorda, A. (2017). Benefits of retinal image motion at

Binocular FEM with bSLO

- 534 the limits of spatial vision. *Journal of vision*, 17(1), 30-30, <https://doi.org/10.1167/17.1.30>.
- 535 Reiniger, J. L., Domdei, N., Holz, F. G., & Harmening, W. M. (2021). Human gaze is systematically  
536 offset from the center of cone topography. *Current Biology*, 31(18), 4188-4193,  
537 <https://doi.org/10.1016/j.cub.2021.07.005>.
- 538 Riggs, L. A., & Ratliff, F. (1951). Visual acuity and the normal tremor of the eyes. *Science*, 114(2949),  
539 17-18, <https://doi.org/10.1126/science.114.2949.17>.
- 540 Rolfs, M. (2009). Microsaccades: small steps on a long way. *Vision research*, 49(20), 2415-2441,  
541 <https://doi.org/10.1016/j.visres.2009.08.010>.
- 542 Rucci, M., & Victor, J. D. (2015). The unsteady eye: an information-processing stage, not a bug.  
543 *Trends in neurosciences*, 38(4), 195-206, <https://doi.org/10.1016/j.tins.2015.01.005>.
- 544 Schor, C. M., & Ciuffreda, K. J. (1983). Accommodative Vergence and Accommodation in Normals,  
545 Amblyopes, and Strabismics. *Vergence Eye Movements: Basic*, 143.
- 546 Schulz, E. (1984). Binocular micromovements in normal persons. *Graefes archive for clinical and*  
547 *experimental ophthalmology*, 222(2), 95-100.
- 548 Sheehy, C. K., Yang, Q., Arathorn, D. W., Tiruveedhula, P., de Boer, J. F., & Roorda, A. (2012). High-  
549 speed, image-based eye tracking with a scanning laser ophthalmoscope. *Biomedical optics*  
550 *express*, 3(10), 2611-2622, <https://doi.org/10.1364/BOE.3.002611>.
- 551 Shenoy, J., Fong, J., Tan, J., Roorda, A., & Ng, R. (2021). R-SLAM: Optimizing Eye Tracking from Rolling  
552 Shutter Video of the Retina. *In Proceedings of the IEEE/CVF International Conference on*  
553 *Computer Vision* (pp. 4852-4861).
- 554 Simon, F., Schulz, E., Rassow, B., & Haase, W. (1984). Binocular micromovement recording of human  
555 eyes: - methods. *Graefes archive for clinical and experimental ophthalmology*, 221(6), 293-  
556 298., <https://doi.org/10.1007/BF02134127>.
- 557 Spauschus, A., Marsden, J., Halliday, D. M., Rosenberg, J. R., & Brown, P. (1999). The origin of ocular  
558 microtremor in man. *Experimental Brain Research*, 126(4), 556-562,  
559 <https://doi.org/10.1007/s002210050764>.
- 560 Steinman, S. B., Steinman, B. A., & Garzia, R. P. (2000). Foundations of binocular vision: a clinical  
561 perspective. *McGraw-Hill Education/Medical*.
- 562 Steven, S., Sulai, Y. N., Cheong, S. K., Bentley, J., & Dubra, A. (2018). Long eye relief fundus camera  
563 and fixation target with partial correction of ocular longitudinal chromatic aberration.  
564 *Biomedical Optics Express*, 9(12), 6017-6037, <https://doi.org/10.1364/BOE.9.006017>.
- 565 Stevenson, S. B., Roorda, A., & Kumar, G. (2010). Eye tracking with the adaptive optics scanning laser  
566 ophthalmoscope. *In Proceedings of the 2010 symposium on eye-tracking research &*  
567 *applications* (pp. 195-198), <https://doi.org/10.1145/1743666.1743714>.
- 568 Stevenson, S. B., Sheehy, C. K., & Roorda, A. (2016). Binocular eye tracking with the tracking scanning  
569 laser ophthalmoscope. *Vision research*, 118, 98-104,  
570 <https://doi.org/10.1016/j.visres.2015.01.019>.
- 571 Szkulmowski, M., Meina, M., Bartuzel, M., Wrobel, K., Tamborski, S., Nowakowski, M. &  
572 Szkulmowska, A. (2020). Ultrafast retinal tracker for quantification of fixational and saccadic  
573 motion of the human eye. *Investigative Ophthalmology & Visual Science*, 61(7), 1849-1849.
- 574 Tweed, D. (1997). Visual-motor optimization in binocular control. *Vision research*, 37(14), 1939-1951,  
575 [https://doi.org/10.1016/S0042-6989\(97\)00002-3](https://doi.org/10.1016/S0042-6989(97)00002-3).

Binocular FEM with bsLO

- 576 Van Rijn, L. J., Van der Steen, J., & Collewijn, H. (1992). Visually induced cycloverision and  
577 cyclovergence. *Vision Research*, 32(10), 1875-1883, [https://doi.org/10.1016/0042-](https://doi.org/10.1016/0042-6989(92)90048-N)  
578 [6989\(92\)90048-N](https://doi.org/10.1016/0042-6989(92)90048-N).
- 579 Van Rijn, L. J., Van der Steen, J., & Collewijn, H. (1994). Instability of ocular torsion during fixation:  
580 cyclovergence is more stable than cycloverision. *Vision Research*, 34(8), 1077-1087,  
581 [https://doi.org/10.1016/0042-6989\(94\)90011-6](https://doi.org/10.1016/0042-6989(94)90011-6).
- 582 Vogel, C. R., Arathorn, D. W., Roorda, A., & Parker, A. (2006). Retinal motion estimation in adaptive  
583 optics scanning laser ophthalmoscopy. *Optics express*, 14(2), 487-497,  
584 <https://doi.org/10.1364/OPEX.14.000487>.
- 585 Yang, Q., Arathorn, D. W., Tiruveedhula, P., Vogel, C. R., & Roorda, A. (2010). Design of an integrated  
586 hardware interface for AOSLO image capture and cone-targeted stimulus delivery. *Optics*  
587 *express*, 18(17), 17841-17858, <https://doi.org/10.1364/OE.18.017841>.
- 588 Zhou, W., & King, W. M. (1998). Premotor commands encode monocular eye movements. *Nature*,  
589 393(6686), 692-695, <https://doi.org/10.1038/31489>.
- 590 Zuber, B. L., Stark, L., & Cook, G. (1965). Microsaccades and the velocity-amplitude relationship for  
591 saccadic eye movements. *Science*, 150(3702), 1459-1460,  
592 <https://doi.org/10.1126/science.150.3702.1459>.
- 593
- 594
- 595
- 596
